# Supplementary material
Source: publisher figshare collection journal article supplement (https://acs.figshare.com/ndownloader/files/4168222)
Supplement: Supplementary file 1 [file 4168222]

 
data_sa995 
 
_audit_creation_method            SHELXL-97 
_chemical_name_systematic 
; 
 ? 
; 
_chemical_name_common             ? 
_chemical_melting_point           ? 
_chemical_formula_moiety          'C31 H20 Cl2 N2 O2 S' 
_chemical_formula_sum 
 'C31 H20 Cl2 N2 O2 S' 
_chemical_formula_weight          555.45 
 
loop_ 
 _atom_type_symbol 
 _atom_type_description 
 _atom_type_scat_dispersion_real 
 _atom_type_scat_dispersion_imag 
 _atom_type_scat_source 
 'C'  'C'   0.0033   0.0016 
 'International Tables Vol C Tables 4.2.6.8 and 6.1.1.4' 
 'H'  'H'   0.0000   0.0000 
 'International Tables Vol C Tables 4.2.6.8 and 6.1.1.4' 
 'N'  'N'   0.0061   0.0033 
 'International Tables Vol C Tables 4.2.6.8 and 6.1.1.4' 
 'O'  'O'   0.0106   0.0060 
 'International Tables Vol C Tables 4.2.6.8 and 6.1.1.4' 
 'S'  'S'   0.1246   0.1234 
 'International Tables Vol C Tables 4.2.6.8 and 6.1.1.4' 
 'Cl'  'Cl'   0.1484   0.1585 
 'International Tables Vol C Tables 4.2.6.8 and 6.1.1.4' 
 
_symmetry_cell_setting            monoclinic
_symmetry_space_group_name_H-M    P2(1)/n 
 
loop_ 
 _symmetry_equiv_pos_as_xyz 
 'x, y, z' 
 '-x+1/2, y+1/2, -z+1/2' 
 '-x, -y, -z' 
 'x-1/2, -y-1/2, z-1/2' 
 
_cell_length_a                    9.5186(18) 
_cell_length_b                    17.509(4) 
_cell_length_c                    15.532(3) 
_cell_angle_alpha                 90.00 
_cell_angle_beta                  92.392(3) 
_cell_angle_gamma                 90.00 
_cell_volume                      2586.2(9) 
_cell_formula_units_Z             4 
_cell_measurement_temperature     173(2) 
_cell_measurement_reflns_used     4629 
_cell_measurement_theta_min       1.75
_cell_measurement_theta_max       27.48
 
_exptl_crystal_description        block 
_exptl_crystal_colour             yellow 
_exptl_crystal_size_max           0.50 
_exptl_crystal_size_mid           0.40 
_exptl_crystal_size_min           0.30 
_exptl_crystal_density_meas       ? 
_exptl_crystal_density_diffrn     1.427 
_exptl_crystal_density_method     'not measured' 
_exptl_crystal_F_000              1144 
_exptl_absorpt_coefficient_mu     0.365 
_exptl_absorpt_correction_type    multi-scan
_exptl_absorpt_correction_T_min   0.8385 
_exptl_absorpt_correction_T_max   0.8983 
_exptl_absorpt_process_details    'CrystalClear (Rigaku Inc., 2007)'

 
_exptl_special_details 
; 
 ? 
; 
 
_diffrn_ambient_temperature       173(2) 
_diffrn_radiation_wavelength      0.71073 
_diffrn_radiation_type            MoK\a 
_diffrn_radiation_source          'sealed tube' 
_diffrn_radiation_monochromator   graphite 
_diffrn_measurement_device_type   'Saturn724+ CCD' 
_diffrn_measurement_method        '\w scans at fixed \c = 45\%'    
_diffrn_detector_area_resol_mean  ? 
_diffrn_standards_number          ? 
_diffrn_standards_interval_count  ? 
_diffrn_standards_interval_time   ? 
_diffrn_standards_decay_%         ? 
_diffrn_reflns_number             12180 
_diffrn_reflns_av_R_equivalents   0.0285 
_diffrn_reflns_av_sigmaI/netI     0.0400 
_diffrn_reflns_limit_h_min        -12 
_diffrn_reflns_limit_h_max        7 
_diffrn_reflns_limit_k_min        -22 
_diffrn_reflns_limit_k_max        16 
_diffrn_reflns_limit_l_min        -18 
_diffrn_reflns_limit_l_max        20 
_diffrn_reflns_theta_min          2.46 
_diffrn_reflns_theta_max          27.49 
_reflns_number_total              5896 
_reflns_number_gt                 5324 
_reflns_threshold_expression      >2sigma(I) 
 
_computing_data_collection        'CrystalClear (Rigaku Inc., 2007)' 
_computing_cell_refinement        'CrystalClear (Rigaku Inc., 2007)' 
_computing_data_reduction         'CrystalClear (Rigaku Inc., 2007)' 
_computing_structure_solution     'SHELXS-97 (Sheldrick, 1990)' 
_computing_structure_refinement   'SHELXL-97 (Sheldrick, 1997)' 
_computing_molecular_graphics     'XP in Siemens SHELXTL (Sheldrick, 1994)' 
_computing_publication_material   'SHELX97 (Sheldrick, 1997)' 

 
_refine_special_details 
; 
 Refinement of F^2^ against ALL reflections.  The weighted R-factor wR and 
 goodness of fit S are based on F^2^, conventional R-factors R are based 
 on F, with F set to zero for negative F^2^. The threshold expression of 
 F^2^ > 2sigma(F^2^) is used only for calculating R-factors(gt) etc. and is 
 not relevant to the choice of reflections for refinement.  R-factors based 
 on F^2^ are statistically about twice as large as those based on F, and R- 
 factors based on ALL data will be even larger. 
; 
 
_refine_ls_structure_factor_coef  Fsqd  
_refine_ls_matrix_type            full 
_refine_ls_weighting_scheme       calc  
_refine_ls_weighting_details 
 'calc w=1/[\s^2^(Fo^2^)+(0.0425P)^2^+1.7413P] where P=(Fo^2^+2Fc^2^)/3' 
_atom_sites_solution_primary      direct 
_atom_sites_solution_secondary    difmap 
_atom_sites_solution_hydrogens    geom 
_refine_ls_hydrogen_treatment     constr
_refine_ls_extinction_method      none 
_refine_ls_extinction_coef        ? 
_refine_ls_number_reflns          5896 
_refine_ls_number_parameters      343 
_refine_ls_number_restraints      0 
_refine_ls_R_factor_all           0.0688 
_refine_ls_R_factor_gt            0.0606 
_refine_ls_wR_factor_ref          0.1339 
_refine_ls_wR_factor_gt           0.1286 
_refine_ls_goodness_of_fit_ref    1.160 
_refine_ls_restrained_S_all       1.160 
_refine_ls_shift/su_max           0.000 
_refine_ls_shift/su_mean          0.000 
 
loop_ 
 _atom_site_label 
 _atom_site_type_symbol 
 _atom_site_fract_x 
 _atom_site_fract_y 
 _atom_site_fract_z 
 _atom_site_U_iso_or_equiv 
 _atom_site_adp_type 
 _atom_site_occupancy 
 _atom_site_symmetry_multiplicity 
 _atom_site_calc_flag 
 _atom_site_refinement_flags 
 _atom_site_disorder_assembly 
 _atom_site_disorder_group 
Cl1 Cl 0.43666(7) -0.06510(4) 0.15225(4) 0.04295(18) Uani 1 1 d . . . 
Cl2 Cl 0.67810(7) 0.36628(4) -0.35132(4) 0.04339(18) Uani 1 1 d . . . 
S1 S 0.66571(7) 0.21220(4) 0.15109(4) 0.03660(17) Uani 1 1 d . . . 
O1 O 0.97336(19) 0.11273(10) -0.02438(11) 0.0375(4) Uani 1 1 d . . . 
O2 O 1.17864(19) 0.44829(11) 0.04940(13) 0.0458(5) Uani 1 1 d . . . 
N1 N 0.8068(2) 0.33436(11) 0.11130(13) 0.0326(5) Uani 1 1 d . . . 
N2 N 0.9474(2) 0.44148(12) 0.13189(14) 0.0382(5) Uani 1 1 d . . . 
H2A H 1.0225 0.4690 0.1224 0.046 Uiso 1 1 calc R . . 
H2B H 0.8835 0.4589 0.1662 0.046 Uiso 1 1 calc R . . 
C1 C 0.9304(3) 0.37316(14) 0.09420(15) 0.0319(5) Uani 1 1 d . . . 
C2 C 1.0258(2) 0.34171(14) 0.03947(15) 0.0312(5) Uani 1 1 d . . . 
C3 C 0.9767(2) 0.27374(13) -0.01455(15) 0.0290(5) Uani 1 1 d . . . 
H3A H 1.0613 0.2430 -0.0286 0.035 Uiso 1 1 calc R . . 
C4 C 0.8795(2) 0.22300(13) 0.03575(15) 0.0291(5) Uani 1 1 d . . . 
C5 C 0.7939(2) 0.25681(13) 0.09215(15) 0.0295(5) Uani 1 1 d . . . 
C6 C 0.8829(2) 0.14151(14) 0.02050(14) 0.0298(5) Uani 1 1 d . . . 
C7 C 0.7729(2) 0.09218(13) 0.05634(14) 0.0292(5) Uani 1 1 d . . . 
C8 C 0.6729(3) 0.11884(13) 0.11261(15) 0.0312(5) Uani 1 1 d . . . 
C9 C 0.7661(3) 0.01559(14) 0.03081(16) 0.0341(5) Uani 1 1 d . . . 
H9A H 0.8338 -0.0034 -0.0070 0.041 Uiso 1 1 calc R . . 
C10 C 0.6642(3) -0.03281(15) 0.05884(16) 0.0371(6) Uani 1 1 d . . . 
H10A H 0.6603 -0.0844 0.0401 0.044 Uiso 1 1 calc R . . 
C11 C 0.5667(3) -0.00477(14) 0.11534(16) 0.0337(5) Uani 1 1 d . . . 
C12 C 0.5698(3) 0.06980(14) 0.14302(16) 0.0343(5) Uani 1 1 d . . . 
H12A H 0.5032 0.0878 0.1821 0.041 Uiso 1 1 calc R . . 
C13 C 1.1521(3) 0.38211(14) 0.02208(17) 0.0356(5) Uani 1 1 d . . . 
C14 C 1.2607(3) 0.34591(14) -0.03237(17) 0.0350(5) Uani 1 1 d . . . 
C15 C 1.3031(3) 0.38347(18) -0.1051(2) 0.0537(8) Uani 1 1 d . . . 
H15A H 1.2603 0.4305 -0.1218 0.064 Uiso 1 1 calc R . . 
C16 C 1.4076(4) 0.3528(2) -0.1538(2) 0.0664(10) Uani 1 1 d . . . 
H16A H 1.4343 0.3782 -0.2046 0.080 Uiso 1 1 calc R . . 
C17 C 1.4733(3) 0.28557(18) -0.1289(2) 0.0569(9) Uani 1 1 d . . . 
H17A H 1.5451 0.2646 -0.1625 0.068 Uiso 1 1 calc R . . 
C18 C 1.4340(3) 0.24934(16) -0.0553(2) 0.0457(7) Uani 1 1 d . . . 
H18A H 1.4810 0.2040 -0.0368 0.055 Uiso 1 1 calc R . . 
C19 C 1.3266(3) 0.27835(15) -0.00805(18) 0.0395(6) Uani 1 1 d . . . 
H19A H 1.2977 0.2518 0.0415 0.047 Uiso 1 1 calc R . . 
C20 C 0.9019(2) 0.29825(13) -0.09990(15) 0.0285(5) Uani 1 1 d . . . 
C21 C 0.8541(3) 0.37221(14) -0.11340(16) 0.0333(5) Uani 1 1 d . . . 
H21A H 0.8680 0.4092 -0.0691 0.040 Uiso 1 1 calc R . . 
C22 C 0.7860(3) 0.39315(14) -0.19068(16) 0.0345(5) Uani 1 1 d . . . 
H22A H 0.7538 0.4441 -0.1991 0.041 Uiso 1 1 calc R . . 
C23 C 0.7654(2) 0.33973(14) -0.25495(15) 0.0317(5) Uani 1 1 d . . . 
C24 C 0.8119(3) 0.26559(15) -0.24353(16) 0.0382(6) Uani 1 1 d . . . 
H24A H 0.7977 0.2288 -0.2880 0.046 Uiso 1 1 calc R . . 
C25 C 0.8795(3) 0.24579(14) -0.16621(16) 0.0365(6) Uani 1 1 d . . . 
H25A H 0.9116 0.1948 -0.1582 0.044 Uiso 1 1 calc R . . 
C26 C 0.6965(3) 0.37277(13) 0.15569(15) 0.0315(5) Uani 1 1 d . . . 
C27 C 0.5877(3) 0.40624(15) 0.10766(17) 0.0400(6) Uani 1 1 d . . . 
H27A H 0.5864 0.4044 0.0465 0.048 Uiso 1 1 calc R . . 
C28 C 0.4810(3) 0.44226(17) 0.1491(2) 0.0477(7) Uani 1 1 d . . . 
H28A H 0.4050 0.4649 0.1167 0.057 Uiso 1 1 calc R . . 
C29 C 0.4851(3) 0.44536(16) 0.2383(2) 0.0468(7) Uani 1 1 d . . . 
H29A H 0.4117 0.4705 0.2668 0.056 Uiso 1 1 calc R . . 
C30 C 0.5935(3) 0.41271(16) 0.28578(18) 0.0409(6) Uani 1 1 d . . . 
H30A H 0.5953 0.4155 0.3469 0.049 Uiso 1 1 calc R . . 
C31 C 0.7009(3) 0.37548(15) 0.24488(16) 0.0363(6) Uani 1 1 d . . . 
H31A H 0.7760 0.3523 0.2775 0.044 Uiso 1 1 calc R . . 
 
loop_ 
 _atom_site_aniso_label 
 _atom_site_aniso_U_11 
 _atom_site_aniso_U_22 
 _atom_site_aniso_U_33 
 _atom_site_aniso_U_23 
 _atom_site_aniso_U_13 
 _atom_site_aniso_U_12 
Cl1 0.0410(4) 0.0407(4) 0.0472(4) 0.0038(3) 0.0027(3) -0.0075(3) 
Cl2 0.0465(4) 0.0477(4) 0.0355(3) 0.0021(3) -0.0046(3) 0.0053(3) 
S1 0.0378(4) 0.0329(3) 0.0401(3) -0.0060(2) 0.0132(3) 0.0000(3) 
O1 0.0394(10) 0.0331(9) 0.0411(10) -0.0031(7) 0.0137(8) 0.0068(8) 
O2 0.0362(10) 0.0368(10) 0.0646(13) -0.0133(9) 0.0037(9) -0.0065(8) 
N1 0.0321(11) 0.0284(10) 0.0376(11) -0.0061(8) 0.0068(9) 0.0013(8) 
N2 0.0366(12) 0.0342(12) 0.0441(12) -0.0118(9) 0.0045(9) -0.0031(9) 
C1 0.0338(13) 0.0309(12) 0.0307(12) -0.0025(9) -0.0012(10) -0.0017(10) 
C2 0.0287(12) 0.0313(12) 0.0337(12) -0.0036(9) 0.0011(10) 0.0004(10) 
C3 0.0263(11) 0.0301(12) 0.0305(12) -0.0020(9) 0.0015(9) 0.0018(9) 
C4 0.0297(12) 0.0298(12) 0.0279(11) -0.0011(9) 0.0013(9) 0.0027(9) 
C5 0.0300(12) 0.0294(12) 0.0291(11) -0.0018(9) 0.0000(9) 0.0029(10) 
C6 0.0312(12) 0.0322(12) 0.0258(11) 0.0006(9) 0.0002(9) 0.0059(10) 
C7 0.0296(12) 0.0303(12) 0.0273(11) -0.0005(9) -0.0014(9) 0.0042(9) 
C8 0.0317(12) 0.0284(12) 0.0333(12) -0.0002(9) -0.0001(10) 0.0018(10) 
C9 0.0359(13) 0.0326(13) 0.0339(12) -0.0001(10) 0.0018(10) 0.0052(10) 
C10 0.0418(15) 0.0312(13) 0.0378(13) -0.0023(10) -0.0017(11) 0.0001(11) 
C11 0.0327(13) 0.0352(13) 0.0330(12) 0.0038(10) -0.0016(10) -0.0024(10) 
C12 0.0291(12) 0.0372(13) 0.0365(13) -0.0016(10) 0.0019(10) 0.0023(10) 
C13 0.0316(13) 0.0343(13) 0.0406(13) -0.0001(10) -0.0018(10) -0.0014(10) 
C14 0.0264(12) 0.0344(13) 0.0440(14) -0.0026(11) 0.0008(10) -0.0047(10) 
C15 0.0493(18) 0.0433(17) 0.070(2) 0.0169(14) 0.0198(16) 0.0037(14) 
C16 0.066(2) 0.062(2) 0.075(2) 0.0181(18) 0.0368(19) -0.0012(18) 
C17 0.0437(17) 0.0480(18) 0.081(2) -0.0052(16) 0.0293(17) -0.0038(14) 
C18 0.0356(14) 0.0364(15) 0.0653(19) -0.0033(13) 0.0042(13) 0.0011(12) 
C19 0.0396(14) 0.0341(14) 0.0449(15) 0.0002(11) 0.0035(12) -0.0007(11) 
C20 0.0257(11) 0.0297(12) 0.0305(11) -0.0015(9) 0.0049(9) -0.0001(9) 
C21 0.0363(13) 0.0292(12) 0.0347(12) -0.0038(10) 0.0054(10) -0.0025(10) 
C22 0.0345(13) 0.0285(12) 0.0407(13) 0.0011(10) 0.0030(10) 0.0027(10) 
C23 0.0271(12) 0.0368(13) 0.0315(12) 0.0021(10) 0.0046(9) 0.0013(10) 
C24 0.0472(16) 0.0356(13) 0.0319(12) -0.0083(10) 0.0013(11) 0.0028(12) 
C25 0.0460(15) 0.0282(12) 0.0353(13) -0.0028(10) 0.0010(11) 0.0073(11) 
C26 0.0327(13) 0.0284(12) 0.0335(12) -0.0078(9) 0.0042(10) 0.0017(10) 
C27 0.0424(15) 0.0384(14) 0.0389(14) -0.0041(11) -0.0002(11) 0.0027(12) 
C28 0.0373(15) 0.0440(16) 0.0615(19) -0.0043(13) -0.0005(13) 0.0083(12) 
C29 0.0374(15) 0.0420(16) 0.0622(19) -0.0139(13) 0.0148(13) 0.0009(12) 
C30 0.0412(15) 0.0419(15) 0.0404(14) -0.0115(11) 0.0113(12) -0.0078(12) 
C31 0.0337(13) 0.0420(14) 0.0334(13) -0.0048(10) 0.0025(10) -0.0006(11) 
 
_geom_special_details 
; 
 All esds (except the esd in the dihedral angle between two l.s. planes) 
 are estimated using the full covariance matrix.  The cell esds are taken 
 into account individually in the estimation of esds in distances, angles 
 and torsion angles; correlations between esds in cell parameters are only 
 used when they are defined by crystal symmetry.  An approximate (isotropic) 
 treatment of cell esds is used for estimating esds involving l.s. planes. 
; 
 
loop_ 
 _geom_bond_atom_site_label_1 
 _geom_bond_atom_site_label_2 
 _geom_bond_distance 
 _geom_bond_site_symmetry_2 
 _geom_bond_publ_flag 
Cl1 C11 1.742(2) . ? 
Cl2 C23 1.744(3) . ? 
S1 C5 1.741(2) . ? 
S1 C8 1.743(2) . ? 
O1 C6 1.238(3) . ? 
O2 C13 1.256(3) . ? 
N1 C1 1.394(3) . ? 
N1 C5 1.394(3) . ? 
N1 C26 1.446(3) . ? 
N2 C1 1.339(3) . ? 
N2 H2A 0.8800 . ? 
N2 H2B 0.8800 . ? 
C1 C2 1.384(3) . ? 
C2 C13 1.430(3) . ? 
C2 C3 1.519(3) . ? 
C3 C4 1.521(3) . ? 
C3 C20 1.539(3) . ? 
C3 H3A 1.0000 . ? 
C4 C5 1.357(3) . ? 
C4 C6 1.447(3) . ? 
C6 C7 1.483(3) . ? 
C7 C8 1.398(3) . ? 
C7 C9 1.399(3) . ? 
C8 C12 1.401(3) . ? 
C9 C10 1.372(3) . ? 
C9 H9A 0.9500 . ? 
C10 C11 1.393(3) . ? 
C10 H10A 0.9500 . ? 
C11 C12 1.374(3) . ? 
C12 H12A 0.9500 . ? 
C13 C14 1.503(3) . ? 
C14 C15 1.383(4) . ? 
C14 C19 1.384(4) . ? 
C15 C16 1.382(4) . ? 
C15 H15A 0.9500 . ? 
C16 C17 1.381(5) . ? 
C16 H16A 0.9500 . ? 
C17 C18 1.374(4) . ? 
C17 H17A 0.9500 . ? 
C18 C19 1.380(4) . ? 
C18 H18A 0.9500 . ? 
C19 H19A 0.9500 . ? 
C20 C21 1.386(3) . ? 
C20 C25 1.390(3) . ? 
C21 C22 1.389(4) . ? 
C21 H21A 0.9500 . ? 
C22 C23 1.376(3) . ? 
C22 H22A 0.9500 . ? 
C23 C24 1.381(4) . ? 
C24 C25 1.383(4) . ? 
C24 H24A 0.9500 . ? 
C25 H25A 0.9500 . ? 
C26 C27 1.381(4) . ? 
C26 C31 1.385(3) . ? 
C27 C28 1.378(4) . ? 
C27 H27A 0.9500 . ? 
C28 C29 1.385(4) . ? 
C28 H28A 0.9500 . ? 
C29 C30 1.369(4) . ? 
C29 H29A 0.9500 . ? 
C30 C31 1.388(3) . ? 
C30 H30A 0.9500 . ? 
C31 H31A 0.9500 . ? 
 
loop_ 
 _geom_angle_atom_site_label_1 
 _geom_angle_atom_site_label_2 
 _geom_angle_atom_site_label_3 
 _geom_angle 
 _geom_angle_site_symmetry_1 
 _geom_angle_site_symmetry_3 
 _geom_angle_publ_flag 
C5 S1 C8 101.65(11) . . ? 
C1 N1 C5 120.09(19) . . ? 
C1 N1 C26 119.98(19) . . ? 
C5 N1 C26 119.71(19) . . ? 
C1 N2 H2A 120.0 . . ? 
C1 N2 H2B 120.0 . . ? 
H2A N2 H2B 120.0 . . ? 
N2 C1 C2 123.6(2) . . ? 
N2 C1 N1 116.1(2) . . ? 
C2 C1 N1 120.3(2) . . ? 
C1 C2 C13 119.8(2) . . ? 
C1 C2 C3 117.1(2) . . ? 
C13 C2 C3 121.7(2) . . ? 
C2 C3 C4 110.72(19) . . ? 
C2 C3 C20 112.21(19) . . ? 
C4 C3 C20 109.63(19) . . ? 
C2 C3 H3A 108.0 . . ? 
C4 C3 H3A 108.0 . . ? 
C20 C3 H3A 108.0 . . ? 
C5 C4 C6 123.6(2) . . ? 
C5 C4 C3 118.1(2) . . ? 
C6 C4 C3 118.29(19) . . ? 
C4 C5 N1 120.8(2) . . ? 
C4 C5 S1 126.64(19) . . ? 
N1 C5 S1 112.46(16) . . ? 
O1 C6 C4 120.9(2) . . ? 
O1 C6 C7 119.5(2) . . ? 
C4 C6 C7 119.5(2) . . ? 
C8 C7 C9 118.2(2) . . ? 
C8 C7 C6 123.3(2) . . ? 
C9 C7 C6 118.5(2) . . ? 
C7 C8 C12 120.7(2) . . ? 
C7 C8 S1 124.40(19) . . ? 
C12 C8 S1 114.90(18) . . ? 
C10 C9 C7 121.8(2) . . ? 
C10 C9 H9A 119.1 . . ? 
C7 C9 H9A 119.1 . . ? 
C9 C10 C11 118.7(2) . . ? 
C9 C10 H10A 120.6 . . ? 
C11 C10 H10A 120.6 . . ? 
C12 C11 C10 121.7(2) . . ? 
C12 C11 Cl1 118.64(19) . . ? 
C10 C11 Cl1 119.66(19) . . ? 
C11 C12 C8 118.9(2) . . ? 
C11 C12 H12A 120.6 . . ? 
C8 C12 H12A 120.6 . . ? 
O2 C13 C2 123.5(2) . . ? 
O2 C13 C14 116.5(2) . . ? 
C2 C13 C14 120.1(2) . . ? 
C15 C14 C19 119.0(2) . . ? 
C15 C14 C13 119.4(2) . . ? 
C19 C14 C13 121.4(2) . . ? 
C16 C15 C14 120.3(3) . . ? 
C16 C15 H15A 119.9 . . ? 
C14 C15 H15A 119.9 . . ? 
C17 C16 C15 120.4(3) . . ? 
C17 C16 H16A 119.8 . . ? 
C15 C16 H16A 119.8 . . ? 
C18 C17 C16 119.4(3) . . ? 
C18 C17 H17A 120.3 . . ? 
C16 C17 H17A 120.3 . . ? 
C17 C18 C19 120.4(3) . . ? 
C17 C18 H18A 119.8 . . ? 
C19 C18 H18A 119.8 . . ? 
C18 C19 C14 120.5(3) . . ? 
C18 C19 H19A 119.8 . . ? 
C14 C19 H19A 119.8 . . ? 
C21 C20 C25 117.8(2) . . ? 
C21 C20 C3 121.9(2) . . ? 
C25 C20 C3 120.3(2) . . ? 
C20 C21 C22 121.1(2) . . ? 
C20 C21 H21A 119.5 . . ? 
C22 C21 H21A 119.5 . . ? 
C23 C22 C21 119.6(2) . . ? 
C23 C22 H22A 120.2 . . ? 
C21 C22 H22A 120.2 . . ? 
C22 C23 C24 120.7(2) . . ? 
C22 C23 Cl2 119.32(19) . . ? 
C24 C23 Cl2 119.97(19) . . ? 
C23 C24 C25 118.8(2) . . ? 
C23 C24 H24A 120.6 . . ? 
C25 C24 H24A 120.6 . . ? 
C24 C25 C20 122.0(2) . . ? 
C24 C25 H25A 119.0 . . ? 
C20 C25 H25A 119.0 . . ? 
C27 C26 C31 121.1(2) . . ? 
C27 C26 N1 118.9(2) . . ? 
C31 C26 N1 120.0(2) . . ? 
C28 C27 C26 119.5(3) . . ? 
C28 C27 H27A 120.2 . . ? 
C26 C27 H27A 120.2 . . ? 
C27 C28 C29 119.6(3) . . ? 
C27 C28 H28A 120.2 . . ? 
C29 C28 H28A 120.2 . . ? 
C30 C29 C28 120.8(2) . . ? 
C30 C29 H29A 119.6 . . ? 
C28 C29 H29A 119.6 . . ? 
C29 C30 C31 120.2(3) . . ? 
C29 C30 H30A 119.9 . . ? 
C31 C30 H30A 119.9 . . ? 
C26 C31 C30 118.8(2) . . ? 
C26 C31 H31A 120.6 . . ? 
C30 C31 H31A 120.6 . . ? 
 
loop_ 
 _geom_torsion_atom_site_label_1 
 _geom_torsion_atom_site_label_2 
 _geom_torsion_atom_site_label_3 
 _geom_torsion_atom_site_label_4 
 _geom_torsion 
 _geom_torsion_site_symmetry_1 
 _geom_torsion_site_symmetry_2 
 _geom_torsion_site_symmetry_3 
 _geom_torsion_site_symmetry_4 
 _geom_torsion_publ_flag 
C5 N1 C1 N2 -165.1(2) . . . . ? 
C26 N1 C1 N2 9.6(3) . . . . ? 
C5 N1 C1 C2 16.3(3) . . . . ? 
C26 N1 C1 C2 -169.0(2) . . . . ? 
N2 C1 C2 C13 1.3(4) . . . . ? 
N1 C1 C2 C13 179.7(2) . . . . ? 
N2 C1 C2 C3 -165.7(2) . . . . ? 
N1 C1 C2 C3 12.7(3) . . . . ? 
C1 C2 C3 C4 -36.1(3) . . . . ? 
C13 C2 C3 C4 157.2(2) . . . . ? 
C1 C2 C3 C20 86.8(3) . . . . ? 
C13 C2 C3 C20 -80.0(3) . . . . ? 
C2 C3 C4 C5 33.8(3) . . . . ? 
C20 C3 C4 C5 -90.5(3) . . . . ? 
C2 C3 C4 C6 -146.5(2) . . . . ? 
C20 C3 C4 C6 89.1(3) . . . . ? 
C6 C4 C5 N1 172.6(2) . . . . ? 
C3 C4 C5 N1 -7.8(3) . . . . ? 
C6 C4 C5 S1 -4.5(4) . . . . ? 
C3 C4 C5 S1 175.15(17) . . . . ? 
C1 N1 C5 C4 -19.1(3) . . . . ? 
C26 N1 C5 C4 166.2(2) . . . . ? 
C1 N1 C5 S1 158.36(18) . . . . ? 
C26 N1 C5 S1 -16.3(3) . . . . ? 
C8 S1 C5 C4 -3.5(3) . . . . ? 
C8 S1 C5 N1 179.17(17) . . . . ? 
C5 C4 C6 O1 -172.0(2) . . . . ? 
C3 C4 C6 O1 8.4(3) . . . . ? 
C5 C4 C6 C7 10.4(4) . . . . ? 
C3 C4 C6 C7 -169.2(2) . . . . ? 
O1 C6 C7 C8 175.2(2) . . . . ? 
C4 C6 C7 C8 -7.1(3) . . . . ? 
O1 C6 C7 C9 -6.6(3) . . . . ? 
C4 C6 C7 C9 171.0(2) . . . . ? 
C9 C7 C8 C12 0.6(4) . . . . ? 
C6 C7 C8 C12 178.7(2) . . . . ? 
C9 C7 C8 S1 179.92(18) . . . . ? 
C6 C7 C8 S1 -1.9(3) . . . . ? 
C5 S1 C8 C7 6.5(2) . . . . ? 
C5 S1 C8 C12 -174.12(19) . . . . ? 
C8 C7 C9 C10 0.6(4) . . . . ? 
C6 C7 C9 C10 -177.7(2) . . . . ? 
C7 C9 C10 C11 -1.0(4) . . . . ? 
C9 C10 C11 C12 0.3(4) . . . . ? 
C9 C10 C11 Cl1 -179.77(19) . . . . ? 
C10 C11 C12 C8 0.8(4) . . . . ? 
Cl1 C11 C12 C8 -179.12(19) . . . . ? 
C7 C8 C12 C11 -1.2(4) . . . . ? 
S1 C8 C12 C11 179.35(19) . . . . ? 
C1 C2 C13 O2 -5.0(4) . . . . ? 
C3 C2 C13 O2 161.4(2) . . . . ? 
C1 C2 C13 C14 175.8(2) . . . . ? 
C3 C2 C13 C14 -17.8(4) . . . . ? 
O2 C13 C14 C15 -55.4(4) . . . . ? 
C2 C13 C14 C15 123.9(3) . . . . ? 
O2 C13 C14 C19 119.9(3) . . . . ? 
C2 C13 C14 C19 -60.8(3) . . . . ? 
C19 C14 C15 C16 1.5(5) . . . . ? 
C13 C14 C15 C16 177.0(3) . . . . ? 
C14 C15 C16 C17 -1.8(6) . . . . ? 
C15 C16 C17 C18 0.0(6) . . . . ? 
C16 C17 C18 C19 2.2(5) . . . . ? 
C17 C18 C19 C14 -2.5(4) . . . . ? 
C15 C14 C19 C18 0.6(4) . . . . ? 
C13 C14 C19 C18 -174.7(2) . . . . ? 
C2 C3 C20 C21 -15.8(3) . . . . ? 
C4 C3 C20 C21 107.7(2) . . . . ? 
C2 C3 C20 C25 164.6(2) . . . . ? 
C4 C3 C20 C25 -71.9(3) . . . . ? 
C25 C20 C21 C22 0.0(4) . . . . ? 
C3 C20 C21 C22 -179.6(2) . . . . ? 
C20 C21 C22 C23 0.1(4) . . . . ? 
C21 C22 C23 C24 -0.2(4) . . . . ? 
C21 C22 C23 Cl2 179.30(18) . . . . ? 
C22 C23 C24 C25 0.1(4) . . . . ? 
Cl2 C23 C24 C25 -179.3(2) . . . . ? 
C23 C24 C25 C20 0.0(4) . . . . ? 
C21 C20 C25 C24 0.0(4) . . . . ? 
C3 C20 C25 C24 179.6(2) . . . . ? 
C1 N1 C26 C27 95.2(3) . . . . ? 
C5 N1 C26 C27 -90.1(3) . . . . ? 
C1 N1 C26 C31 -84.9(3) . . . . ? 
C5 N1 C26 C31 89.8(3) . . . . ? 
C31 C26 C27 C28 -0.7(4) . . . . ? 
N1 C26 C27 C28 179.2(2) . . . . ? 
C26 C27 C28 C29 0.9(4) . . . . ? 
C27 C28 C29 C30 -0.4(4) . . . . ? 
C28 C29 C30 C31 -0.4(4) . . . . ? 
C27 C26 C31 C30 -0.1(4) . . . . ? 
N1 C26 C31 C30 -180.0(2) . . . . ? 
C29 C30 C31 C26 0.6(4) . . . . ? 
 
loop_ 
 _geom_hbond_atom_site_label_D 
 _geom_hbond_atom_site_label_H 
 _geom_hbond_atom_site_label_A 
 _geom_hbond_distance_DH 
 _geom_hbond_distance_HA 
 _geom_hbond_distance_DA 
 _geom_hbond_angle_DHA 
 _geom_hbond_site_symmetry_A 
N2 H2A O2  0.88 1.94 2.595(3) 130.1 . 
 
_diffrn_measured_fraction_theta_max    0.991 
_diffrn_reflns_theta_full              27.49 
_diffrn_measured_fraction_theta_full   0.991 
_refine_diff_density_max    0.291 
_refine_diff_density_min   -0.252 
_refine_diff_density_rms    0.057 
